# Supplementary material for: Enhanced Antibody Production in Clever-1/Stabilin-1–Deficient Mice
Source: PubMed Central journal article supplement (PMC6187969; doi:10.3389/fimmu.2018.02257), 2018-10-08
Supplement: Data_Sheet_1.pdf [file Data_Sheet_1.pdf]

## Enhanced Antibody Production in Clever-1/Stabilin-1-deficient mice

Johannes Dunkel<sup>1†</sup>, Miro Viitala<sup>1†</sup>, Marika Karikoski<sup>1</sup>, Pia Rantakari<sup>1</sup>, Reetta Virtakoivu<sup>1</sup>, Kati Elimä<sup>1</sup>, Maija Hollmén<sup>1</sup>, Sirpa Jalkanen<sup>1</sup> and Marko Salmi<sup>1\*</sup>

### Supplementary Figures

**FIGURE S1.** Splenic T cell phenotype in *Stab1*<sup>-/-</sup> mice. **(A–C)** Frequencies of splenic CD4<sup>+</sup> and CD8<sup>+</sup> T cells **(A)**, splenic CD4<sup>+</sup> and CD8<sup>+</sup> memory (CD44<sup>high</sup> CD62L<sup>high</sup>), effector (CD44<sup>high</sup> CD62L<sup>low</sup>) and naïve (CD44<sup>low</sup> and CD62L<sup>high</sup>) T cells **(B)** and splenic regulatory T cells (CD4<sup>+</sup> CD25<sup>+</sup> Foxp3<sup>+</sup>) **(C)** in wildtype and *Stab1*<sup>-/-</sup> mice. **(A–C)** Each data point represents one mouse and bars represent the means ± s.e.m., *n* = 9 (wildtype and *Stab1*<sup>-/-</sup>) **(A)**, 5 (*Stab1*<sup>-/-</sup> and wildtype) **(B)** and 7 (wildtype and *Stab1*<sup>-/-</sup>) **(C)**. Statistical significance was determined with two-way ANOVA followed by Bonferroni's multiple comparisons tests **(A, B)** or Student's unpaired two-tailed *t*-test **(C)**, \*\*\*\* *p* < 0.0001.

**FIGURE S2.** The anti-Clever-1 antibody is specific. Sectioned spleens from wildtype (top row) and *Stab1*<sup>-/-</sup> mice (bottom row) were stained with antibodies against Clever-1 (left, green) or PV-1 (center, red). Merged images are shown on the rightmost column, yellow color indicates co-localization.

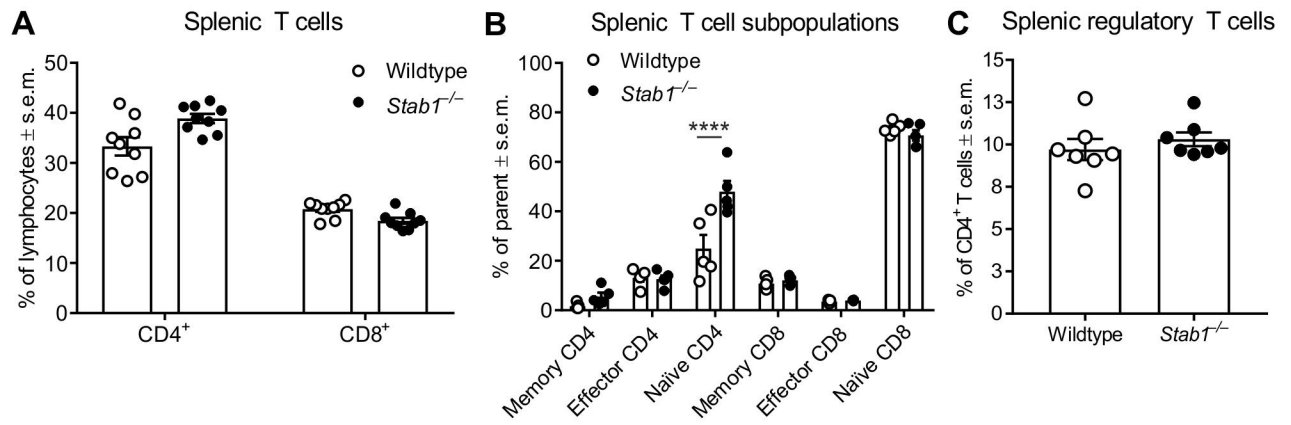

Supplementary Figure S1

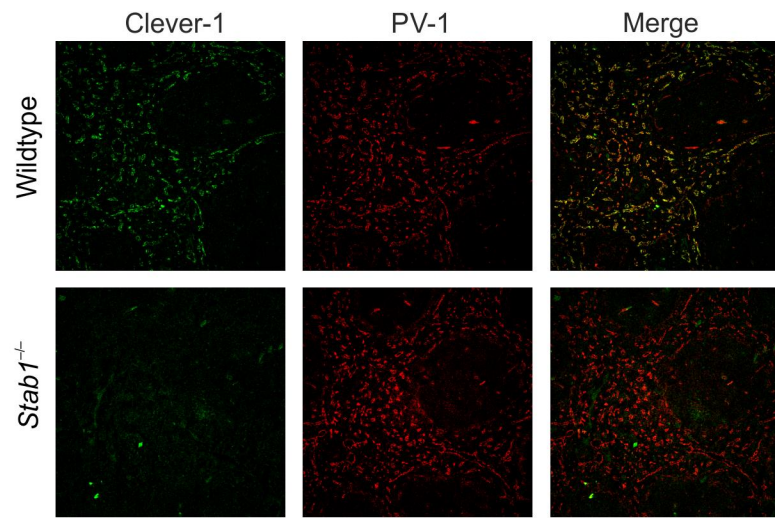

Supplementary Figure S2

## Supplementary Tables

**Supplementary Table 1.** Phenotype of T cells in wildtype and *Stab1*<sup>-/-</sup> mice.

|                                                       | Bone marrow                      |                                  | Blood                            |                                  |     |
|-------------------------------------------------------|----------------------------------|----------------------------------|----------------------------------|----------------------------------|-----|
|                                                       | Wildtype                         | <i>Stab1</i> <sup>-/-</sup>      | Wildtype                         | <i>Stab1</i> <sup>-/-</sup>      |     |
| CD4 <sup>+</sup> T cells                              |                                  |                                  |                                  |                                  |     |
| Memory (CD44 <sup>high</sup> CD62L <sup>high</sup> )  | 21.8 ± 2.5 <sup>a)</sup> (n = 5) | 28.4 ± 1.3 <sup>a)</sup> (n = 5) | 6.9 ± 1.0 <sup>a)</sup> (n = 4)  | 7.5 ± 1.7 <sup>a)</sup> (n = 5)  |     |
| Effector (CD44 <sup>high</sup> CD62L <sup>low</sup> ) | 23.2 ± 2.0 <sup>a)</sup> (n = 5) | 22.0 ± 1.0 <sup>a)</sup> (n = 5) | 3.9 ± 1.1 <sup>a)</sup> (n = 4)  | 3.2 ± 1.2 <sup>a)</sup> (n = 5)  |     |
| Naïve (CD44 <sup>low</sup> CD62L <sup>high</sup> )    | 34.7 ± 5.0 <sup>a)</sup> (n = 5) | 27.3 ± 1.6 <sup>a)</sup> (n = 5) | 77.1 ± 3.9 <sup>a)</sup> (n = 4) | 70.0 ± 8.6 <sup>a)</sup> (n = 5) |     |
| Total                                                 |                                  |                                  | 28.4 ± 3.6 <sup>a)</sup> (n = 9) | 17.4 ± 2.2 <sup>a)</sup> (n = 9) | *b) |
| CD8 <sup>+</sup> T cells                              |                                  |                                  |                                  |                                  |     |
| Memory (CD44 <sup>high</sup> CD62L <sup>high</sup> )  | 11.9 ± 1.6 <sup>a)</sup> (n = 5) | 13.4 ± 1.5 <sup>a)</sup> (n = 5) | 6.2 ± 1.5 <sup>a)</sup> (n = 4)  | 5.2 ± 1.3 <sup>a)</sup> (n = 5)  |     |
| Effector (CD44 <sup>high</sup> CD62L <sup>low</sup> ) | 6.9 ± 0.9 <sup>a)</sup> (n = 5)  | 13.2 ± 2.5 <sup>a)</sup> (n = 5) | 6.5 ± 0.4 <sup>a)</sup> (n = 4)  | 6.4 ± 0.6 <sup>a)</sup> (n = 5)  |     |
| Naïve (CD44 <sup>low</sup> CD62L <sup>high</sup> )    | 55.1 ± 2.0 <sup>a)</sup> (n = 5) | 49.1 ± 2.1 <sup>a)</sup> (n = 5) | 33.0 ± 4.6 <sup>a)</sup> (n = 4) | 23.0 ± 7.8 <sup>a)</sup> (n = 5) |     |
| Total                                                 |                                  |                                  | 29.4 ± 3.2 <sup>a)</sup> (n = 9) | 22.0 ± 1.5 <sup>a)</sup> (n = 9) |     |

a) % of cells (mean ± SEM)  
b)\* *P* < 0.05, \*\*\* *P* < 0.001 (two-way ANOVA)

**Supplementary Table 2.**

List of significantly upregulated genes (FC > 2) in liver tissue from 2-week-old *Stab1*<sup>-/-</sup> mice compared to WT mice by RNA-seq analysis

| Gene ID | log <sub>2</sub> <i>Stab1</i> <sup>-/-</sup> /WT | Symbol            | Description                                                                    |
|---------|--------------------------------------------------|-------------------|--------------------------------------------------------------------------------|
| 26388   | 9,02                                             | Ifi202b           | interferon activated gene 202B                                                 |
| 624784  | 6,18                                             | Gm9855            | thymine DNA glycosylase pseudogene                                             |
| 19785   | 3,88                                             | Rprl3             | ribonuclease P RNA-like 3                                                      |
| 619326  | 3,50                                             | 9130409I2<br>3Rik | RIKEN cDNA 9130409I23 gene                                                     |
| 13097   | 3,42                                             | Cyp2c38           | cytochrome P450, family 2, subfamily c, polypeptide 38                         |
| 13098   | 3,03                                             | Cyp2c39           | cytochrome P450, family 2, subfamily c, polypeptide 39                         |
| 381806  | 3,03                                             | Gm10319           | murinoglobulin pseudogene                                                      |
| 18405   | 2,92                                             | Orm1              | orosomucoid 1                                                                  |
| 629203  | 2,47                                             | Sult2a3           | sulfotransferase family 2A, dehydroepiandrosterone (DHEA)-preferring, member 3 |
| 546611  | 2,45                                             | Klhl33            | kelch-like 33                                                                  |
| 12053   | 2,30                                             | Bcl6              | B cell leukemia/lymphoma 6                                                     |
| 17836   | 2,26                                             | Mug1              | murinoglobulin 1                                                               |
| 12945   | 2,26                                             | Dmbt1             | deleted in malignant brain tumors 1                                            |
| 404195  | 2,11                                             | Cyp2c54           | cytochrome P450, family 2, subfamily c, polypeptide 54                         |
| 667034  | 1,96                                             | Pnp2              | purine-nucleoside phosphorylase 2                                              |
| 545288  | 1,93                                             | Cyp2c67           | cytochrome P450, family 2, subfamily c, polypeptide 67                         |
| 16625   | 1,86                                             | Serpina3c         | serine (or cysteine) peptidase inhibitor, clade A, member 3C                   |
| 17835   | 1,85                                             | Mug-ps1           | murinoglobulin, pseudogene 1                                                   |
| 20201   | 1,75                                             | S100a8            | S100 calcium binding protein A8 (calgranulin A)                                |
| 103988  | 1,66                                             | Gck               | glucokinase                                                                    |
| 17837   | 1,65                                             | Mug2              | murinoglobulin 2                                                               |
| 20202   | 1,64                                             | S100a9            | S100 calcium binding protein A9 (calgranulin B)                                |
| 20714   | 1,63                                             | Serpina3k         | serine (or cysteine) peptidase inhibitor, clade A, member 3K                   |

|        |      |               |                                                                                                   |
|--------|------|---------------|---------------------------------------------------------------------------------------------------|
| 107141 | 1,56 | Cyp2c50       | cytochrome P450, family 2, subfamily c, polypeptide 50                                            |
| 17750  | 1,45 | Mt2           | metallothionein 2                                                                                 |
| 1E+08  | 1,42 | Gm15772       | ribosomal protein L26 pseudogene                                                                  |
| 76933  | 1,38 | Ifi2712a      | interferon, alpha-inducible protein 27 like 2A                                                    |
| 12796  | 1,34 | Camp          | cathelicidin antimicrobial peptide                                                                |
| 21786  | 1,32 | Tff3          | trefoil factor 3, intestinal                                                                      |
| 259301 | 1,28 | Leap2         | liver-expressed antimicrobial peptide 2                                                           |
| 105171 | 1,28 | Arrdc3        | arrestin domain containing 3                                                                      |
| 331535 | 1,25 | Serpina7      | serine (or cysteine) peptidase inhibitor, clade A (alpha-1 antiproteinase, antitrypsin), member 7 |
| 14262  | 1,23 | Fmo3          | flavin containing monooxygenase 3                                                                 |
| 12012  | 1,23 | Baat          | bile acid-Coenzyme A: amino acid N-acyltransferase                                                |
| 26877  | 1,22 | B3galt1       | UDP-Gal:betaGlcNAc beta 1,3-galactosyltransferase, polypeptide 1                                  |
| 66425  | 1,20 | Pcp4l1        | Purkinje cell protein 4-like 1                                                                    |
| 54123  | 1,18 | Irf7          | interferon regulatory factor 7                                                                    |
| 66107  | 1,17 | 1100001G20Rik | RIKEN cDNA 1100001G20 gene                                                                        |
| 629219 | 1,16 | Sult2a6       | sulfotransferase family 2A, dehydroepiandrosterone (DHEA)-preferring, member 6                    |
| 21743  | 1,11 | Inmt          | indolethylamine N-methyltransferase                                                               |
| 109054 | 1,10 | Pfdn4         | prefoldin 4                                                                                       |
| 69142  | 1,10 | Cd209f        | CD209f antigen                                                                                    |
| 76432  | 1,09 | 2310001H17Rik | RIKEN cDNA 2310001H17 gene                                                                        |
| 13025  | 1,09 | Ctla2b        | cytotoxic T lymphocyte-associated protein 2 beta                                                  |
| 14910  | 1,06 | Gt(ROSA)26Sor | gene trap ROSA 26, Philippe Soriano                                                               |
| 53315  | 1,06 | Sult1d1       | sulfotransferase family 1D, member 1                                                              |
| 68028  | 1,06 | Rpl22l1       | ribosomal protein L22 like 1                                                                      |
| 20115  | 1,05 | Rps7          | ribosomal protein S7                                                                              |
| 66121  | 1,04 | Chchd1        | coiled-coil-helix-coiled-coil-helix domain containing 1                                           |
| 78294  | 1,03 | Rps27a        | ribosomal protein S27A                                                                            |
| 50702  | 1,03 | Cfhr1         | complement factor H-related 1                                                                     |
| 69126  | 1,02 | 1810022K09Rik | RIKEN cDNA 1810022K09 gene                                                                        |
| 108098 | 1,01 | Med21         | mediator complex subunit 21                                                                       |
| 20859  | 1,00 | Sult2a1       | sulfotransferase family 2A, dehydroepiandrosterone (DHEA)-preferring, member 1                    |
| 59048  | 1,00 | C1galt1c1     | C1GALT1-specific chaperone 1                                                                      |

List of upregulated genes (FC > 2) in liver tissue from E17.5 *Stab1*<sup>-/-</sup> mice compared to WT mice by RNA-seq analysis

| GeneID | log <sub>2</sub> <i>Stab1</i> <sup>-/-</sup> /WT | Symbol   | Description                               |
|--------|--------------------------------------------------|----------|-------------------------------------------|
| 14915  | 11,04                                            | Guca2a   | guanylate cyclase activator 2a (guanylin) |
| 99709  | 9,01                                             | AI747448 | expressed sequence AI747448               |
| 23844  | 8,85                                             | Clca3    | chloride channel calcium activated 3      |
| 20287  | 8,77                                             | Sct      | secretin                                  |

| <b>26388</b> | <b>8,64</b> | <b>Ifi202b</b> | <b>interferon activated gene 202B</b>                                                |
|--------------|-------------|----------------|--------------------------------------------------------------------------------------|
| 1,01E+08     | 8,05        | Mptx2          | mucosal pentraxin 2                                                                  |
| 30060        | 7,90        | Mfi2           | antigen p97 (melanoma associated) identified by monoclonal antibodies 133.2 and 96.5 |
| 69826        | 7,57        | Ms4a10         | membrane-spanning 4-domains, subfamily A, member 10                                  |
| 66289        | 7,41        | Mptx1          | mucosal pentraxin 1                                                                  |
| 12591        | 7,22        | Cdx2           | caudal type homeobox 2                                                               |
| 215384       | 7,12        | Fcgbp          | Fc fragment of IgG binding protein                                                   |
| 68553        | 6,88        | Col6a4         | collagen, type VI, alpha 4                                                           |
| 12590        | 6,84        | Cdx1           | caudal type homeobox 1                                                               |
| 14120        | 6,72        | Fbp2           | fructose biphosphatase 2                                                             |
| 99662        | 6,57        | Eps8l3         | EPS8-like 3                                                                          |
| 14275        | 6,57        | Folr1          | folate receptor 1 (adult)                                                            |
| 12557        | 6,25        | Cdh17          | cadherin 17                                                                          |
| 17287        | 6,18        | Mep1a          | meprin 1 alpha                                                                       |
| 19092        | 5,96        | Prkg2          | protein kinase, cGMP-dependent, type II                                              |
| 76768        | 5,95        | Alpi           | alkaline phosphatase, intestinal                                                     |
| 22264        | 5,88        | Prap1          | proline-rich acidic protein 1                                                        |
| 624681       | 5,86        | Btnl6          | butyrophilin-like 6                                                                  |
| 106407       | 5,84        | Slc51a         | solute carrier family 51, alpha subunit                                              |
| 545817       | 5,42        | Cyp2w1         | cytochrome P450, family 2, subfamily w, polypeptide 1                                |
| 381352       | 5,28        | Mamdc4         | MAM domain containing 4                                                              |
| 12716        | 5,25        | Ckmt1          | creatine kinase, mitochondrial 1, ubiquitous                                         |
| 65969        | 5,03        | Cubn           | cubilin (intrinsic factor-cobalamin receptor)                                        |
| 11808        | 4,97        | Apoa4          | apolipoprotein A-IV                                                                  |
| 20731        | 4,94        | Spink4         | serine peptidase inhibitor, Kazal type 4                                             |
| 23795        | 4,82        | Agr2           | anterior gradient 2 ( <i>Xenopus laevis</i> )                                        |
| 546546       | 4,67        | Serpina3h      | serine (or cysteine) peptidase inhibitor, clade A, member 3H                         |
| 239853       | 4,47        | Gpr128         | G protein-coupled receptor 128                                                       |
| 93835        | 4,45        | Amn            | amionless                                                                            |
| 226413       | 4,44        | Lct            | lactase                                                                              |
| 330440       | 4,33        | Gm766          | predicted gene 766                                                                   |
| 14916        | 4,31        | Guca2b         | guanylate cyclase activator 2b (retina)                                              |
| 72040        | 4,25        | Cdhr5          | cadherin-related family member 5                                                     |
| 66260        | 4,24        | Tmem54         | transmembrane protein 54                                                             |
| 11421        | 4,04        | Ace            | angiotensin I converting enzyme (peptidyl-dipeptidase A) 1                           |
| 16763        | 3,97        | Lad1           | ladinin                                                                              |
| 54420        | 3,97        | Cldn8          | claudin 8                                                                            |
| 58860        | 3,67        | Adamdec1       | ADAM-like, decysin 1                                                                 |
| 22349        | 3,63        | Vill1          | villin 1                                                                             |
| 70008        | 3,59        | Ace2           | angiotensin I converting enzyme (peptidyl-dipeptidase A) 2                           |
| 12797        | 3,57        | Cnn1           | calponin 1                                                                           |
| 11468        | 3,50        | Actg2          | actin, gamma 2, smooth muscle, enteric                                               |
| 17063        | 3,35        | Muc13          | mucin 13, epithelial transmembrane                                                   |

|        |      |               |                                                                                                    |
|--------|------|---------------|----------------------------------------------------------------------------------------------------|
| 69787  | 3,25 | Anxa13        | annexin A13                                                                                        |
| 30962  | 3,23 | Slc7a9        | solute carrier family 7 (cationic amino acid transporter, y+ system), member 9                     |
| 209195 | 3,20 | Clic6         | chloride intracellular channel 6                                                                   |
| 11768  | 3,13 | Ap1m2         | adaptor protein complex AP-1, mu 2 subunit                                                         |
| 94071  | 3,09 | Clec2h        | C-type lectin domain family 2, member h                                                            |
| 107753 | 3,06 | Lgals2        | lectin, galactose-binding, soluble 2                                                               |
| 17075  | 3,04 | Epcam         | epithelial cell adhesion molecule                                                                  |
| 70163  | 3,03 | Lypd8         | LY6/PLAUR domain containing 8                                                                      |
| 14917  | 2,98 | Gucy2c        | guanylate cyclase 2c                                                                               |
| 381204 | 2,89 | Naalad11      | N-acetylated alpha-linked acidic dipeptidase-like 1                                                |
| 16855  | 2,75 | Lgals4        | lectin, galactose binding, soluble 4                                                               |
| 17880  | 2,60 | Myh11         | myosin, heavy polypeptide 11, smooth muscle                                                        |
| 72273  | 2,55 | 2210404O07Rik | RIKEN cDNA 2210404O07 gene                                                                         |
| 71960  | 2,55 | Myh14         | myosin, heavy polypeptide 14                                                                       |
| 20716  | 2,29 | Serpina3n     | serine (or cysteine) peptidase inhibitor, clade A, member 3N                                       |
| 14079  | 2,18 | Fabp2         | fatty acid binding protein 2, intestinal                                                           |
| 239083 | 2,05 | Ccnb1ip1      | cyclin B1 interacting protein 1                                                                    |
| 74091  | 2,02 | Npl           | N-acetylneuraminase pyruvate lyase                                                                 |
| 75600  | 1,88 | Calml4        | calmodulin-like 4                                                                                  |
| 53624  | 1,88 | Cldn7         | claudin 7                                                                                          |
| 14778  | 1,79 | Gpx3          | glutathione peroxidase 3                                                                           |
| 84506  | 1,66 | Hamp          | hepcidin antimicrobial peptide                                                                     |
| 16669  | 1,59 | Krt19         | keratin 19                                                                                         |
| 668489 | 1,50 | Gm9199        | glycine cleavage system protein H (aminomethyl carrier) pseudogene                                 |
| 212862 | 1,49 | Chpt1         | choline phosphotransferase 1                                                                       |
| 18242  | 1,49 | Oat           | ornithine aminotransferase                                                                         |
| 235504 | 1,48 | Slc17a5       | solute carrier family 17 (anion/sugar transporter), member 5                                       |
| 66438  | 1,41 | Hamp2         | hepcidin antimicrobial peptide 2                                                                   |
| 13809  | 1,39 | Enpep         | glutamyl aminopeptidase                                                                            |
| 19703  | 1,24 | Renbp         | renin binding protein                                                                              |
| 16006  | 1,23 | Igfbp1        | insulin-like growth factor binding protein 1                                                       |
| 11475  | 1,19 | Acta2         | actin, alpha 2, smooth muscle, aorta                                                               |
| 380780 | 1,14 | Serpina11     | serine (or cysteine) peptidase inhibitor, clade A (alpha-1 antiproteinase, antitrypsin), member 11 |
| 213393 | 1,10 | 8430408G22Rik | RIKEN cDNA 8430408G22 gene                                                                         |
| 12091  | 1,05 | Glb1          | galactosidase, beta 1                                                                              |
